# Supplementary material for: A chimeric antigen receptor-based cellular safeguard mechanism for selective in vivo depletion of engineered T cells
Source: PubMed Central journal article supplement (PMC10808742; doi:10.3389/fimmu.2023.1268698), 2024-01-11
Supplement: DataSheet_1.pdf [file DataSheet_1.pdf]

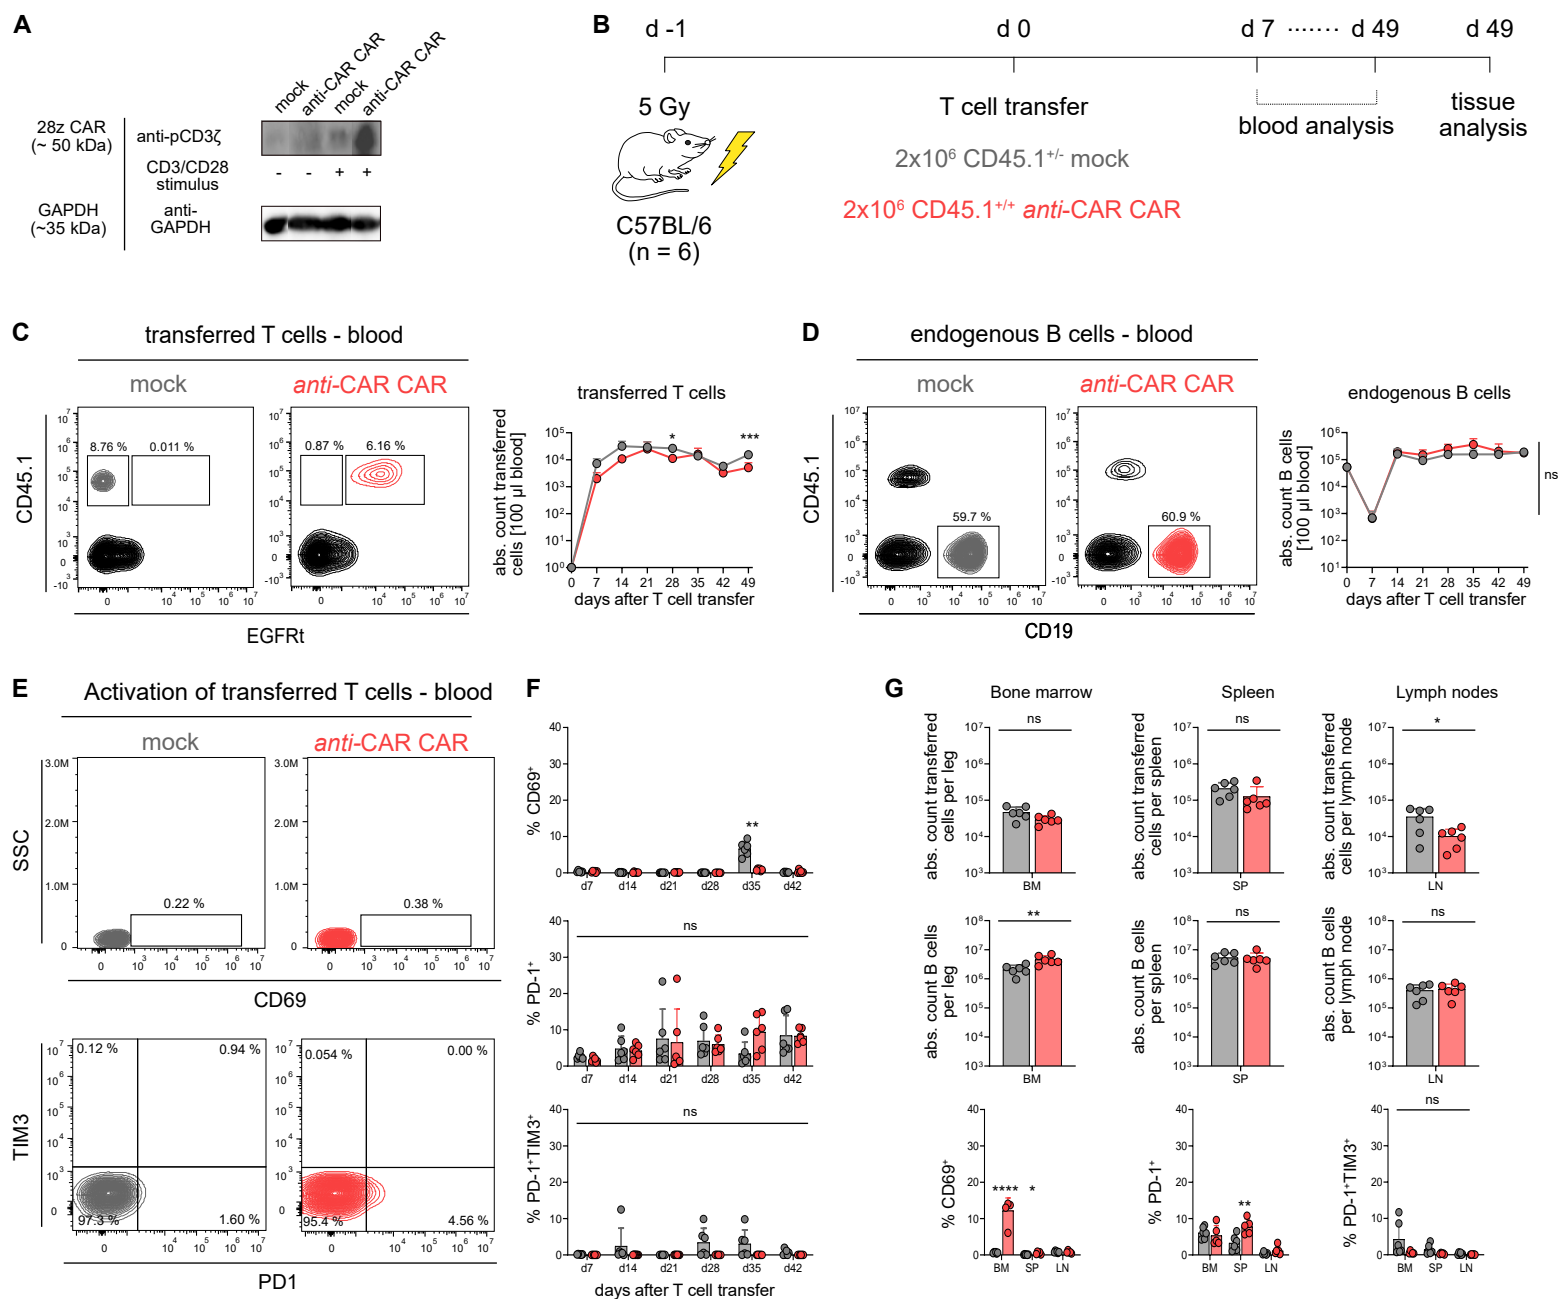

**Supplementary Figure 1. Tracking of anti-CAR CAR-T cells *in vivo*.** (A) Western blot showing pCD3 $\zeta$  expression in rested or activated mock and anti-CAR CAR-T cells. GAPDH was used as a loading control. (B) Schematic of the experimental setup. (C) Representative flow cytometry plots (day 14 post infusion) and quantification over time of mock (CD45.1<sup>+/</sup>/EGFRt<sup>-</sup>) and anti-CAR CAR-T cells (CD45.1<sup>+/</sup>/EGFRt<sup>+</sup>). (D) Representative flow cytometry plots and quantification of endogenous B cells over time. (E) Representative flow cytometry plots of mock cells and anti-CAR CAR-T cells expressing the activation marker CD69 and the activation/exhaustion markers PD-1 and TIM3. (F) Quantification of PD-1<sup>+</sup>, PD-1<sup>+</sup>TIM3<sup>+</sup> and CD69<sup>+</sup> transferred T cells in blood over time. (G) Quantification of transferred T cells, endogenous B cells and the activation marker CD69 as well as the activation/exhaustion markers PD-1 and TIM3 in bone marrow, spleen and lymph nodes at the endpoint (day 50). Data are shown as mean + SD. In (C-G), statistical analyses were performed by two-way ANOVA with Sidak's multiple comparisons test for blood, and unpaired t-test for tissues. \*\*p < 0.01, \*\*\*p < 0.001, \*p < 0.0001.

*anti-CD19 CAR* (blood)

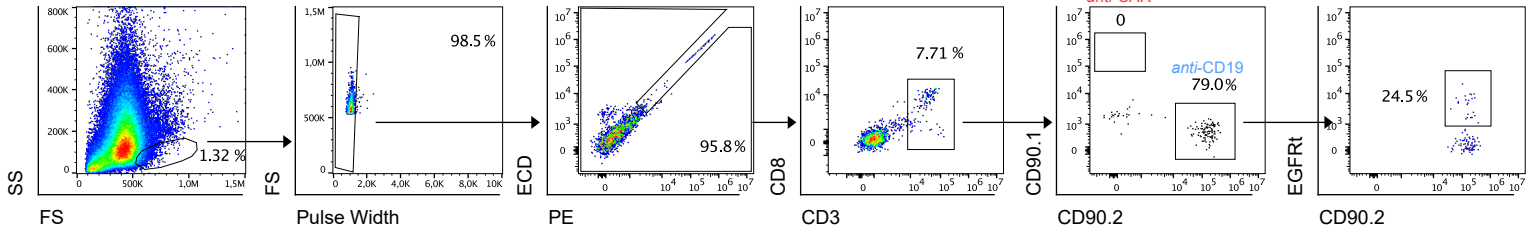

*anti-CD19 CAR* + *anti-CAR CAR* (blood)

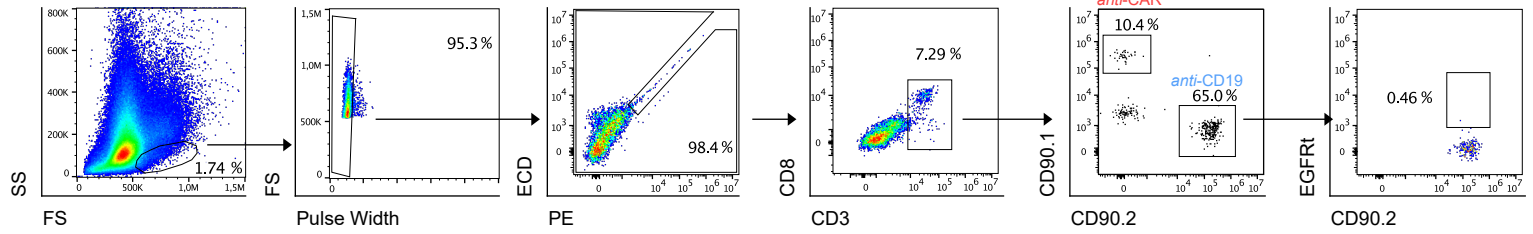

*anti-CD19 CAR* + *anti-CAR CAR* (spleen)

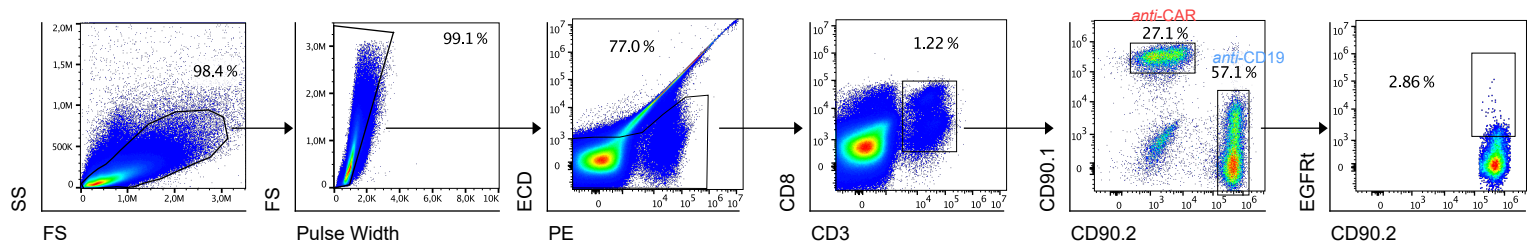

**Supplementary Figure 2. Tracking of *anti-CD19 CAR*-T cells.** Exemplary flow cytometry plots showing the gating strategy used to assess the persistence of *anti-CD19 CAR*-T cells (EGFRt<sup>+</sup> CD90.2<sup>+</sup>) according to the treatment schedule.

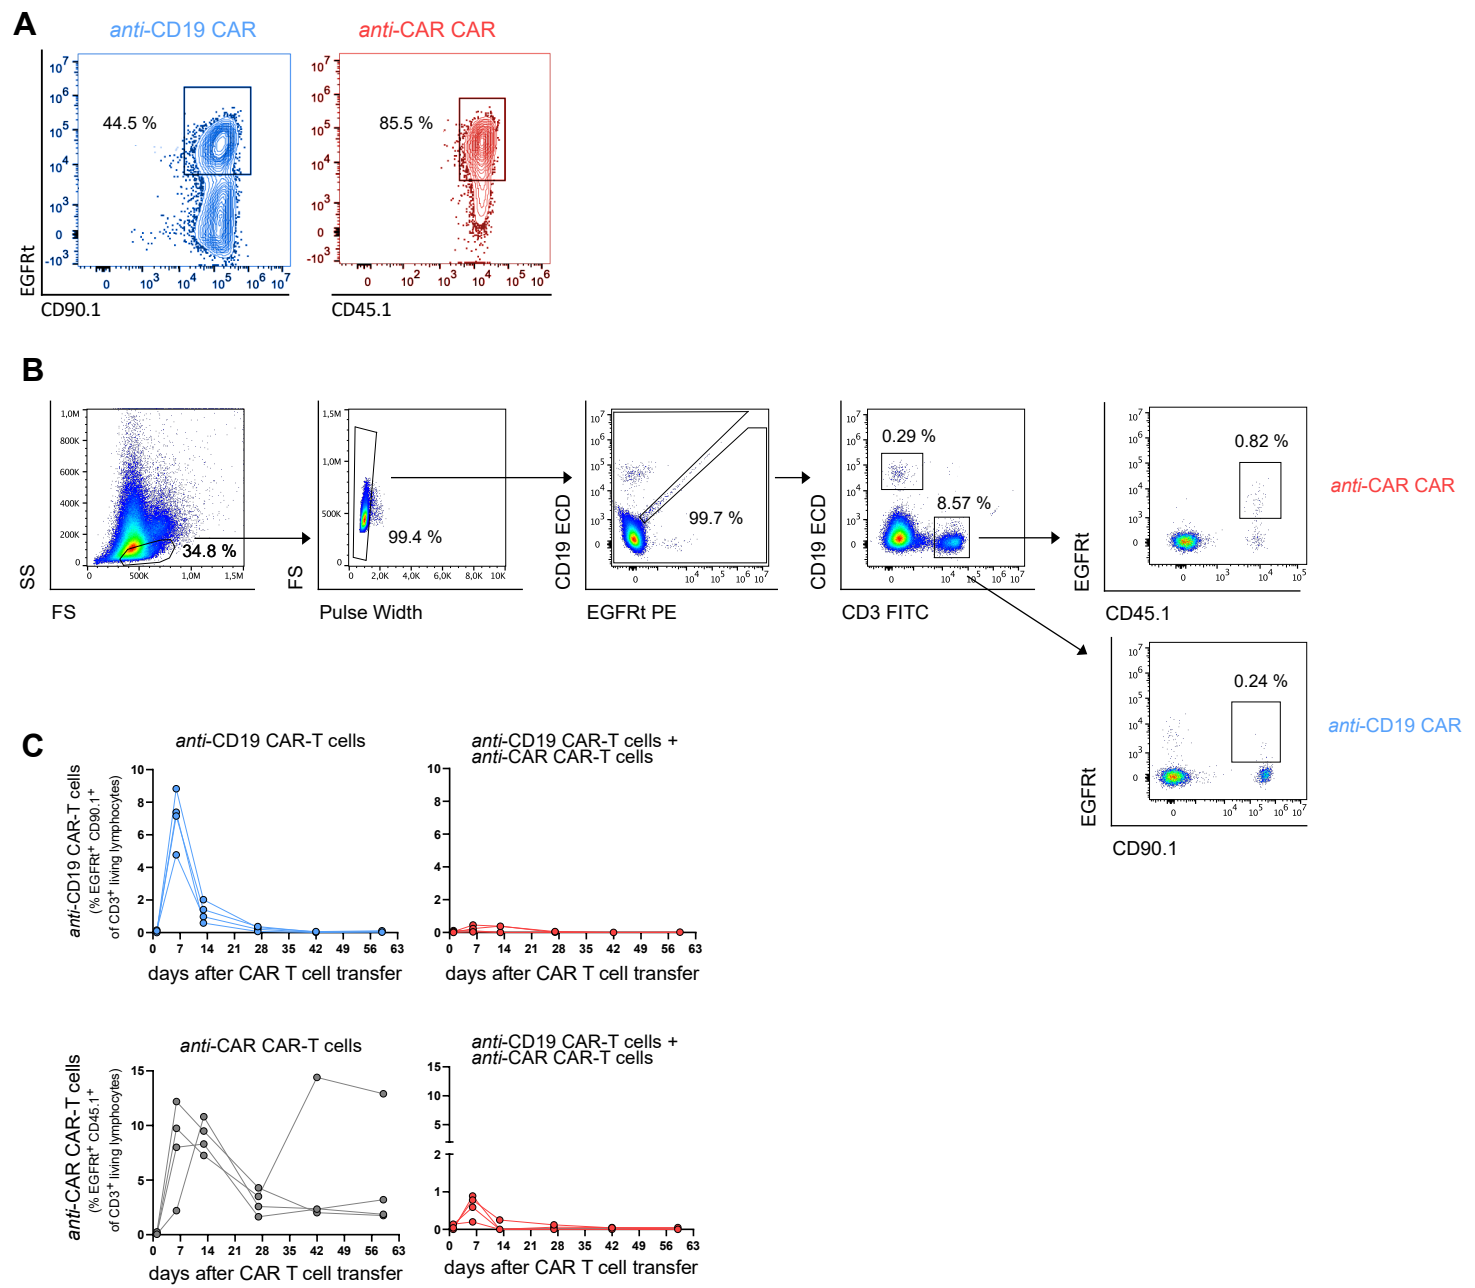

**Supplementary Figure 3. Analyses of *anti-CD19* and *anti-CAR* CAR T cells in co-transfer experiments. (A)** Cell surface expression of CAR constructs after retroviral transduction. **(B)** Exemplary flow cytometry plots showing the gating strategy used to evaluate the persistence of *anti-CD19* CAR-T cells (EGFRt<sup>+</sup> CD90.1<sup>+</sup>) and *anti-CAR* CAR-T cells (EGFRt<sup>+</sup> CD45.1<sup>+</sup>). **(C)** Single mice showing quantification of the frequencies of *anti-CD19* CAR-T cells (upper) and *anti-CAR* CAR-T cells (lower) in blood over time.

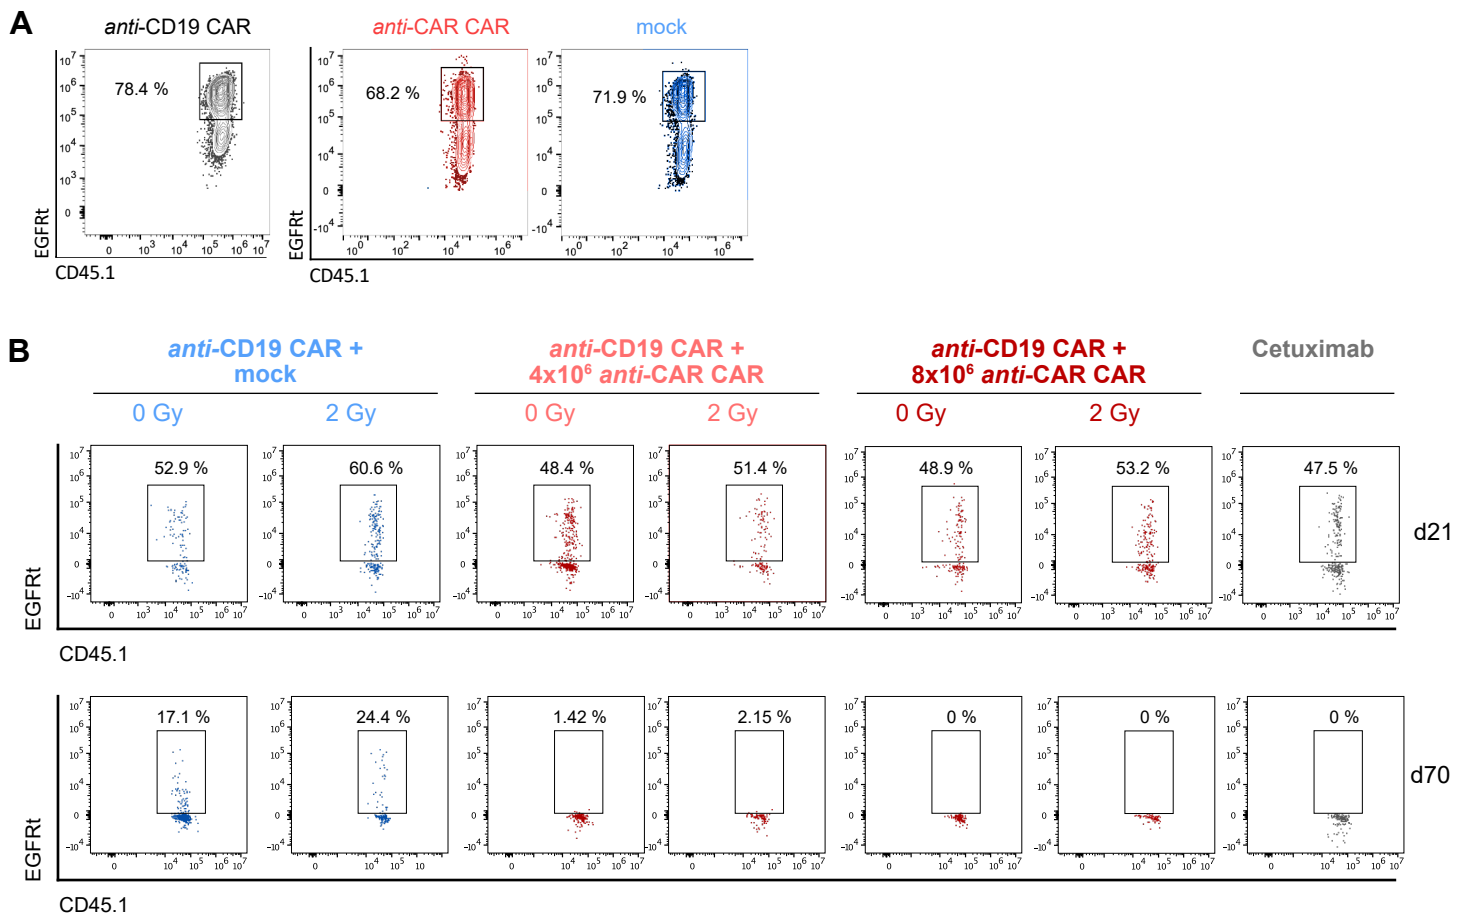

**Supplementary Figure 4. Analyses of anti-CD19 CAR-T cells in a model of therapeutic administration of anti-CAR CAR-T cells. (A) Cell surface expression of CAR constructs after retroviral transduction. (B) Representative flow cytometry plots showing anti-CD19 CAR-T cells in the peripheral circulation at the indicated time points.**
